# Supplementary material for: Endocannabinoid System Components of the Female Mouse Reproductive Tract Are Modulated during Reproductive Aging
Source: MDPI journal article supplement (doi:10.3390/ijms24087542), 2023-04-19
Supplement: s1 [file s1]

## Supplementary material

**Table S1.** Statistical significance of ELISA assay among the different reproductive age groups.

| Ovaries          |                                      |                  |                                                        |                  |                                                        |                                     |                  |                                                        |                  |
|------------------|--------------------------------------|------------------|--------------------------------------------------------|------------------|--------------------------------------------------------|-------------------------------------|------------------|--------------------------------------------------------|------------------|
| P values         | CB <sub>1</sub>                      | CB <sub>2</sub>  | GPR55                                                  | TRPV1            | NAPE-PLD                                               | FAAH                                | DAGL- $\alpha$   | DAGL- $\beta$                                          | MAGL             |
| P < 0.05         | -                                    | PR <i>vs</i> Ad  | -                                                      | PrP <i>vs</i> Ad | LR <i>vs</i> PR                                        | PrP <i>vs</i> Ad                    | -                | -                                                      | -                |
| P < 0.01         | Ad <i>vs</i> PR                      | LR <i>vs</i> PR  | -                                                      | -                | PrP <i>vs</i> Ad                                       | PR <i>vs</i> Ad<br>Ad <i>vs</i> LR  | -                | Ad <i>vs</i> LR<br>PrP <i>vs</i> Ad                    | -                |
| P < 0.001        | PrP <i>vs</i> Ad                     | LR <i>vs</i> Ad  | -                                                      | PR <i>vs</i> PrP | LR <i>vs</i> Ad                                        | PR <i>vs</i> Ad                     | -                | PR <i>vs</i> Ad                                        | -                |
|                  | PrP <i>vs</i> PR                     |                  |                                                        | PR <i>vs</i> Ad  |                                                        | PR <i>vs</i> Ad                     |                  |                                                        |                  |
|                  | LR <i>vs</i> PR                      | PR <i>vs</i> LR  |                                                        |                  | PR <i>vs</i> PrP                                       |                                     |                  |                                                        |                  |
|                  | LR <i>vs</i> Ad                      | LR <i>vs</i> PrP |                                                        |                  |                                                        |                                     |                  |                                                        |                  |
| LR <i>vs</i> PrP | PR <i>vs</i> Ad                      |                  |                                                        | PR <i>vs</i> PrP | PR <i>vs</i> Ad                                        |                                     |                  |                                                        |                  |
| Oviducts         |                                      |                  |                                                        |                  |                                                        |                                     |                  |                                                        |                  |
| P values         | CB <sub>1</sub>                      | CB <sub>2</sub>  | GPR55                                                  | TRPV1            | NAPE-PLD                                               | FAAH                                | DAGL- $\alpha$   | DAGL- $\beta$                                          | MAGL             |
| P < 0.05         | -                                    | PR <i>vs</i> Ad  | Ad <i>vs</i> LR<br>PR <i>vs</i> Ad                     | -                | PrP <i>vs</i> PR<br>LR <i>vs</i> Ad<br>LR <i>vs</i> PR | -                                   | -                | PrP <i>vs</i> Ad                                       | -                |
| P < 0.01         | LR <i>vs</i> PrP                     | LR <i>vs</i> Ad  | -                                                      | -                | PrP <i>vs</i> Ad                                       | -                                   | -                | PR <i>vs</i> PrP                                       | -                |
| P < 0.001        | LR <i>vs</i> Ad<br>LR <i>vs</i> PR   | PrP <i>vs</i> Ad | PR <i>vs</i> LR                                        | PR <i>vs</i> PrP | -                                                      | -                                   | PrP <i>vs</i> Ad | PR <i>vs</i> Ad                                        | PrP <i>vs</i> Ad |
|                  | PrP <i>vs</i> Ad                     | PrP <i>vs</i> LR | PrP <i>vs</i> LR                                       | PR <i>vs</i> Ad  |                                                        |                                     | PrP <i>vs</i> LR | PR <i>vs</i> LR                                        | PrP <i>vs</i> LR |
|                  | PrP <i>vs</i> PR                     | PrP <i>vs</i> PR |                                                        | PR <i>vs</i> LR  |                                                        |                                     | PrP <i>vs</i> PR | PrP <i>vs</i> Ad                                       | PrP <i>vs</i> PR |
|                  |                                      |                  |                                                        |                  |                                                        |                                     |                  |                                                        |                  |
| Uteri            |                                      |                  |                                                        |                  |                                                        |                                     |                  |                                                        |                  |
| P values         | CB <sub>1</sub>                      | CB <sub>2</sub>  | GPR55                                                  | TRPV1            | NAPE-PLD                                               | FAAH                                | DAGL- $\alpha$   | DAGL- $\beta$                                          | MAGL             |
| P < 0.05         | -                                    | -                | PR <i>vs</i> PrP<br>PR <i>vs</i> Ad<br>PR <i>vs</i> LR | -                | LR <i>vs</i> PrP<br>LR <i>vs</i> PR                    | PrP <i>vs</i> Ad<br>PR <i>vs</i> LR | -                | -                                                      | -                |
| P < 0.01         | PrP <i>vs</i> PR                     | -                | -                                                      | -                | LR <i>vs</i> Ad                                        | LR <i>vs</i> Ad<br>PR <i>vs</i> PrP | PR <i>vs</i> Ad  | PrP <i>vs</i> Ad<br>LR <i>vs</i> Ad<br>PR <i>vs</i> Ad | -                |
| P < 0.001        | PrP <i>vs</i> LR<br>Ad <i>vs</i> PrP | PrP <i>vs</i> Ad | -                                                      | -                | -                                                      | PR <i>vs</i> Ad                     | PrP <i>vs</i> Ad | -                                                      | -                |
|                  | Ad <i>vs</i> LR                      | PrP <i>vs</i> LR |                                                        |                  |                                                        |                                     |                  |                                                        |                  |
|                  | Ad <i>vs</i> PR                      | PrP <i>vs</i> PR |                                                        |                  |                                                        |                                     |                  |                                                        |                  |
|                  |                                      |                  |                                                        |                  |                                                        |                                     |                  |                                                        |                  |

*Abbreviations:* Ad, adult; CB<sub>1</sub>, cannabinoid receptor type 1; CB<sub>2</sub>, cannabinoid receptor type 2; DAGL- $\alpha$  and - $\beta$ , diacylglycerol lipases  $\alpha$  and  $\beta$ ; FAAH, fatty acid amide hydrolase; GPR55, G-protein coupled receptor 55; LR, late-reproductive; MAGL, monoacylglycerol lipase NAPE-PLD, *N*-acylphosphatidylethanolamines-specific phospholipase D PR, post-reproductive; PrP, prepubertal; TRPV1, transient receptor potential vanilloid type 1 channel.
